# Supplementary material
Source: publisher site journal article supplement (https://www.dovepress.com/article/340834)
Supplement: Supplementary file 1 [file get_supplementary_file.php]

**Supplementary Table S1.** Multivariate logistic regression analysis variables and assignment

| Variable | Variable name | Variable assignments |
| --- | --- | --- |
| Stroke | Y | 0 = “No”; 1 = “Yes” |
| Sleep duration | X1 | 0 = “7-9 h”; 1 = “<7 h”; 2 = “>9 h” |
| Gender | X2 | 0 = “Male”; 1 = “Female” |
| Age | X3 | 0 = “40-49”; 1 = “50-59”; 2 = “60-69”; 3 = “70-79”; 4 = “≥80” |
| Migrant workers | X4 | 0 = “Yes”; 1 = “No” |
| Major occupation | X5 | 0 = “Unemployed/out of work”; 1 = “Farmers”; 2 = “Teachers/civil servants/institutions”; 3 = “Private business owner/self-employed person”; 4 = “Retirees”; 5 = “Workers”; 6 = “Other occupations” |
| Educational Background | X6 | 0 = "Illiterate/semi-illiterate"; 1 = "Primary school"; 2 = "Junior high school"; 3 = "High school/technical secondary school"; 4 = "College or above" |
| Marital Status | X7 | 0 = “Married”; 1 = “Other” |
| Smoking | X8 | 0 = “Never smoke”; 1 = “Still smoke”; 2 = “Used to smoke” |
| Drinking status | X9 | 0 = “Never drink”; 1 = “Still drink”; 2 = “Used to drink” |
| Sitting or leaning time | X10 | (Continuous variable) No assignment |
| Health status | X11 | 0 = “Good”; 1 = “General”; 3 = “Poor” |
| Sleep quality | X12 | 0 = “Good”; 1 = “General”; 3 = “Poor” |
| Hypertension | X13 | 0 = “No”; 1 = “Yes” |
| Diabetes | X14 | 0 = “No”; 1 = “Yes” |
| CHD | X15 | 0 = “No”; 1 = “Yes” |
